# THE AMERICAN JOURNAL OF PSYCHIATRY

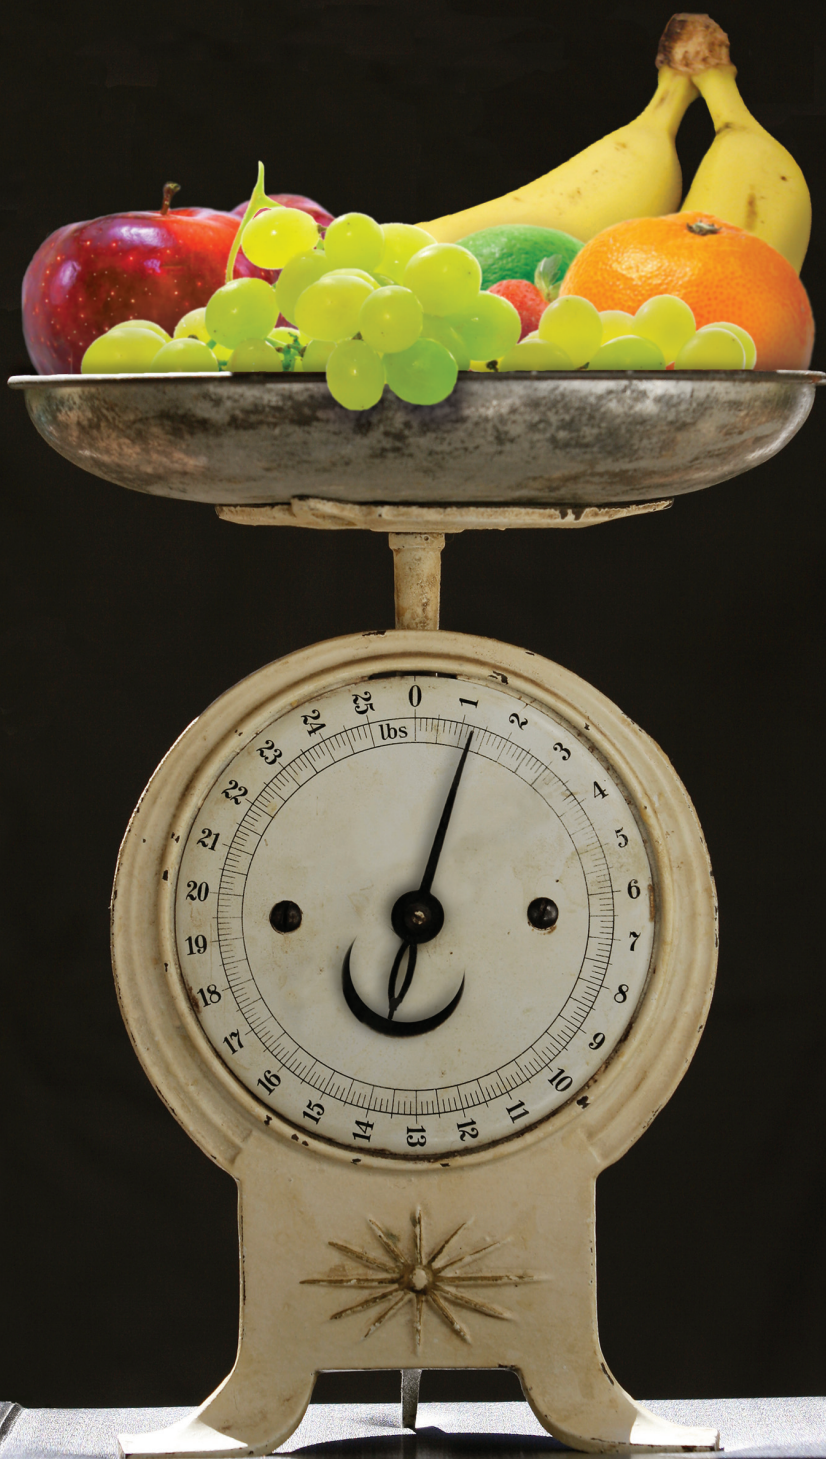

## Prenatal Infection and Schizophrenia: A Review of Epidemiologic and Translational Studies

Alan S. Brown, M.D., M.P.H.  
and Elena J. Derkits, B.A.

261

## Combination of Antidepressant Medications From Treatment Initiation for Major Depressive Disorder: A Double-Blind Randomized Study

Pierre Blier, M.D., Ph.D., et al.

281

## ◀ Association of Western and Traditional Diets With Depression and Anxiety in Women

Felice N. Jacka, Ph.D., et al.

305

## Psychiatric Disorders in Preschool Offspring of Parents With Bipolar Disorder: The Pittsburgh Bipolar Offspring Study (BIOS)

Boris Birmaher, M.D., et al.

321

## Continuing Medical Education

359

March 2010

Volume 167 • Number 3

Official Journal of the  
AMERICAN PSYCHIATRIC ASSOCIATION

[ajp.psychiatryonline.org](http://ajp.psychiatryonline.org)
